# Supplementary material
Source: Springer Nature journal article supplement (https://www.springermedizin.de/resource/supplementary/12885_2007_1062_MOESM2_ESM.pdf/9471008)
Supplement: MOESM2 [file 9471008]

## RFC Promoter A

### Methylated PCR

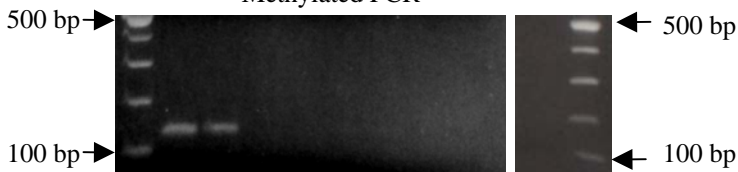

### Unmethylated PCR

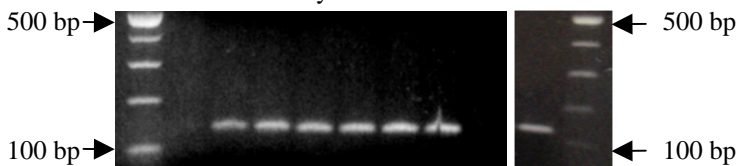

DNA Ladder

MDA-MB-231

M805

MCF-7

CCRF-CEM

M316

HL60R

CEM-T

Water

HT-1080

DNA ladder

## RFC Promoter B

### Methylated PCR

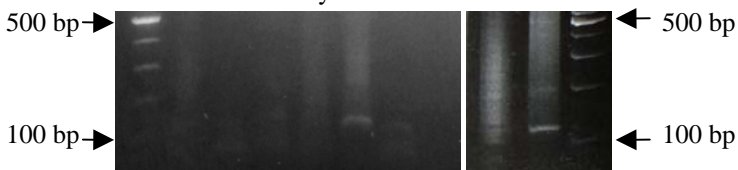

### Unmethylated PCR

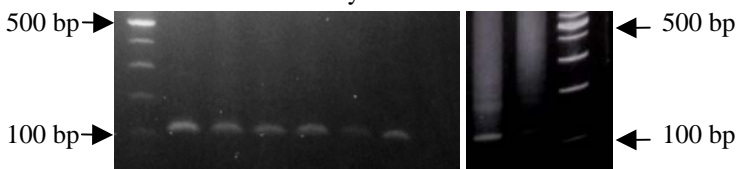

DNA Ladder

MCF-7

CCRF-CEM

M316

HL60R

M805

CEM-T

Water

HT-1080

MDA-MB-231

DNA ladder
